# Supplementary material for: Improvement of the thermal stability of bluish-cyan emitting phosphor Y2MgAl4SiO12:Eu2+ using substitution cations (Zn, Ca, Sr) for white LEDs
Source: Royal Society of Chemistry journal article supplement (doi:10.1039/d1ce01414e), 2021-11-23
Supplement: d1ce01414e1.pdf [file d1ce01414e1.pdf]

**Improvement the thermal stability of bluish-cyan emitting phosphor  
 $\text{Y}_2\text{MgAl}_4\text{SiO}_{12}:\text{Eu}^{2+}$  using substitution cations (Zn, Ca, Sr) for white LEDs**

Huifang Yang<sup>1</sup>, Panlai Li<sup>1\*</sup>, Zejun Ye<sup>1</sup>, Xiaoxue Huo<sup>1</sup>, Yu Wang<sup>1</sup>, Qian Wu<sup>1</sup>, Dawei Wang<sup>2</sup>, Jinxin  
Zhao<sup>2</sup>, Fenghe Wang<sup>1\*</sup>, Zhijun Wang<sup>1\*</sup>

<sup>1</sup>*Hebei Key Laboratory of Optic-electronic Information and Materials, College of Physics Science &  
Technology, Hebei University, Baoding 071002, China*

<sup>2</sup>*Hebei Key Laboratory of Semiconductor Lighting and Display Critical Materials, Baoding, 071000,  
China*

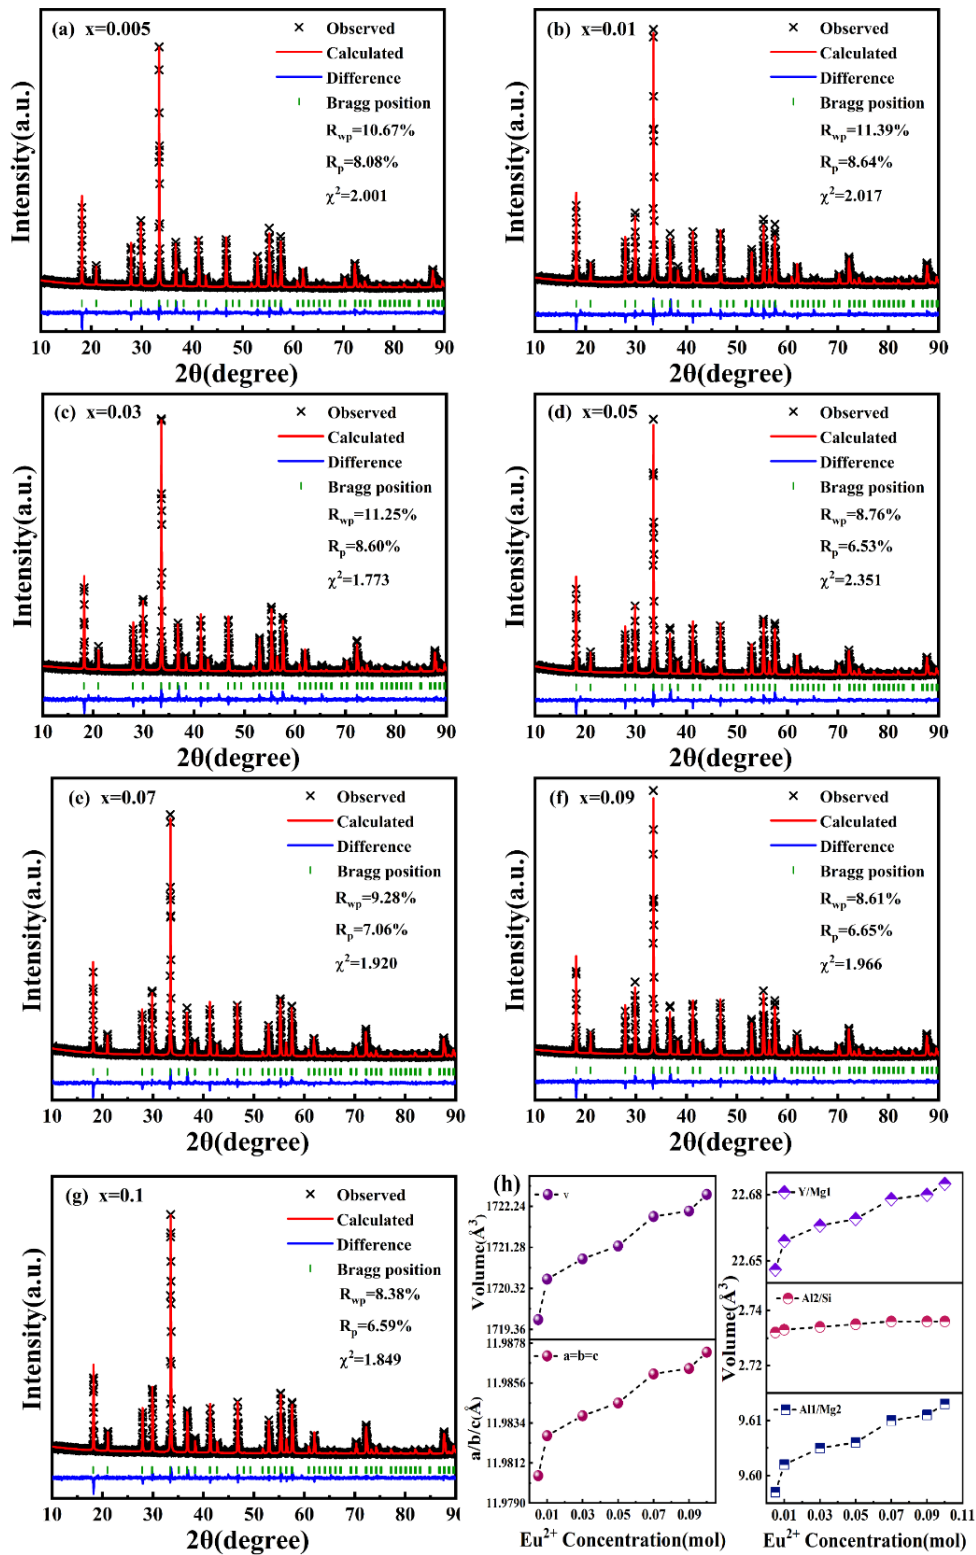

Fig. S1 (a-g) Refinement diagram of YMAS:  $x\text{Eu}^{2+}$  ( $x=0.005-0.1$ ); (h) Cell volume change trend diagram.

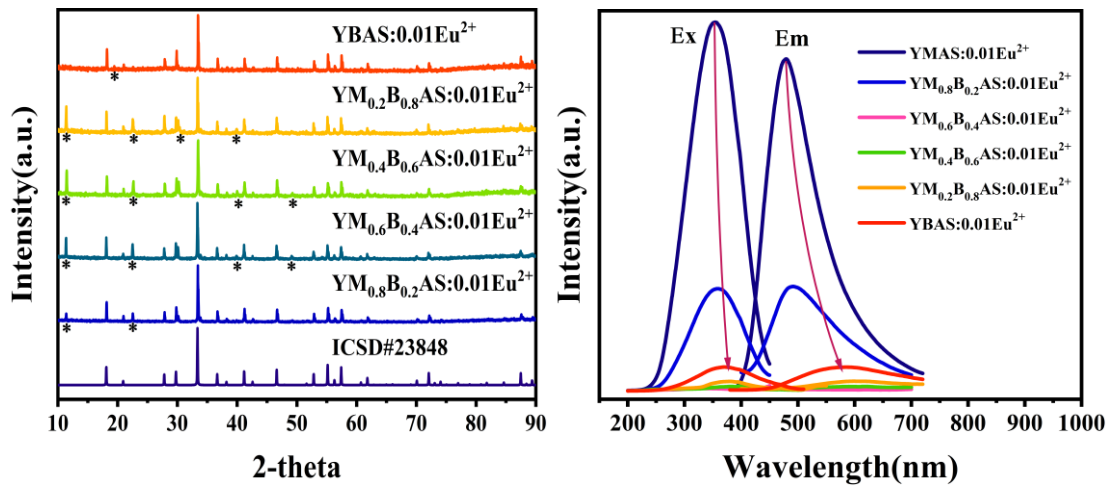

Fig. S2 XRD patterns of  $Y_2(\text{Mg, Ba})\text{Al}_4\text{SiO}_{12}:0.01\text{Eu}^{2+}$ ; Excitation and emission spectra of  $Y_2(\text{Mg, Ba})\text{Al}_4\text{SiO}_{12}:0.01\text{Eu}^{2+}$  phosphor.

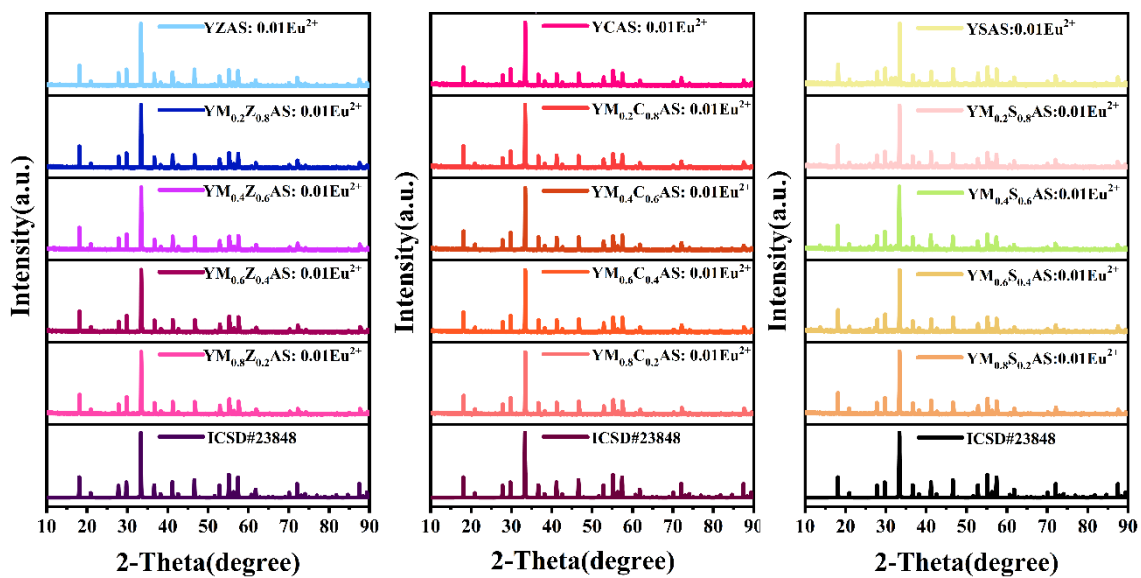

Fig. S3 XRD patterns of  $Y_2Mg_{1-y}M_yAl_4SiO_{12}:0.01Eu^{2+}$  ( $M = Zn, Ca, Sr, y = 0, 0.2, 0.4, 0.6, 0.8, 1$ ).

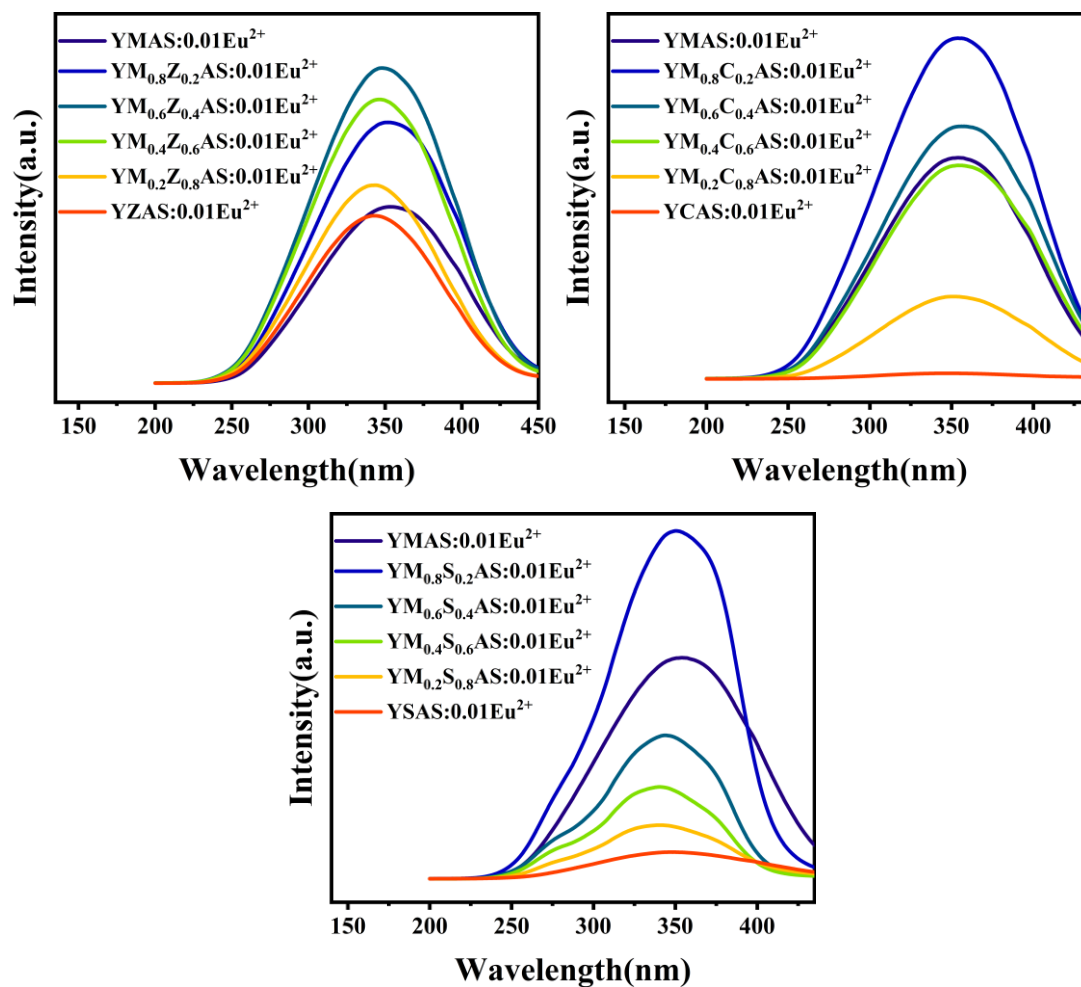

Fig. S4 Excitation spectra of  $Y_2Mg_{1-y}M_yAl_4SiO_{12}:0.01Eu^{2+}$  ( $M=Zn, Ca, Sr$ ) ( $y=0, 0.2, 0.4, 0.6, 0.8, 1$ ) monitoring emission at 470 nm.

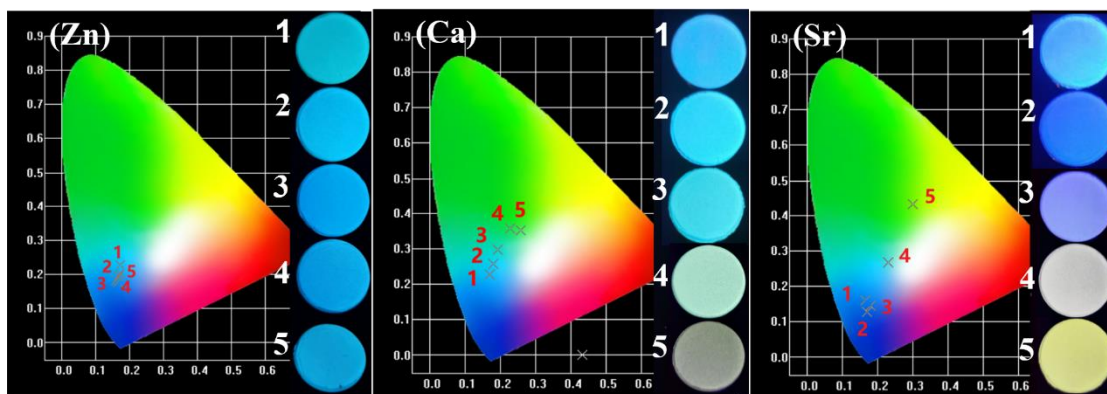

Fig. S5 CIE coordinates of  $Y_2Mg_{1-y}M_yAl_4SiO_{12}: 0.01Eu^{2+}$  ( $M = Zn, Ca, Sr, y = 0.2, 0.4, 0.6, 0.8, 1$ ) and photograph under UV light of 365nm.

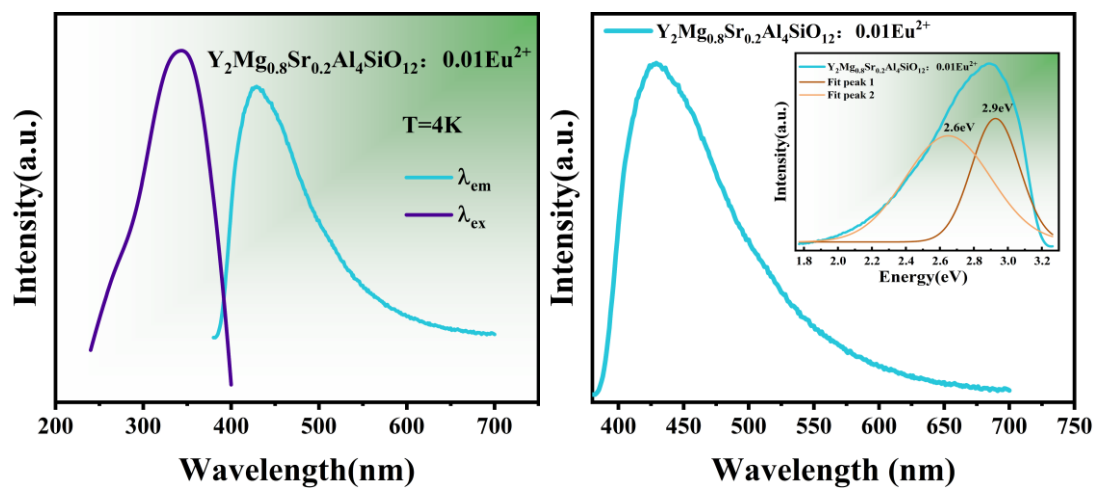

Fig. S6 Excitation and emission spectra of  $\text{Y}_2\text{Mg}_{0.8}\text{Sr}_{0.2}\text{Al}_4\text{SiO}_{12}:0.01\text{Eu}^{2+}$  phosphor at low temperature 4K and Gaussian fitting result at low temperature 4K.

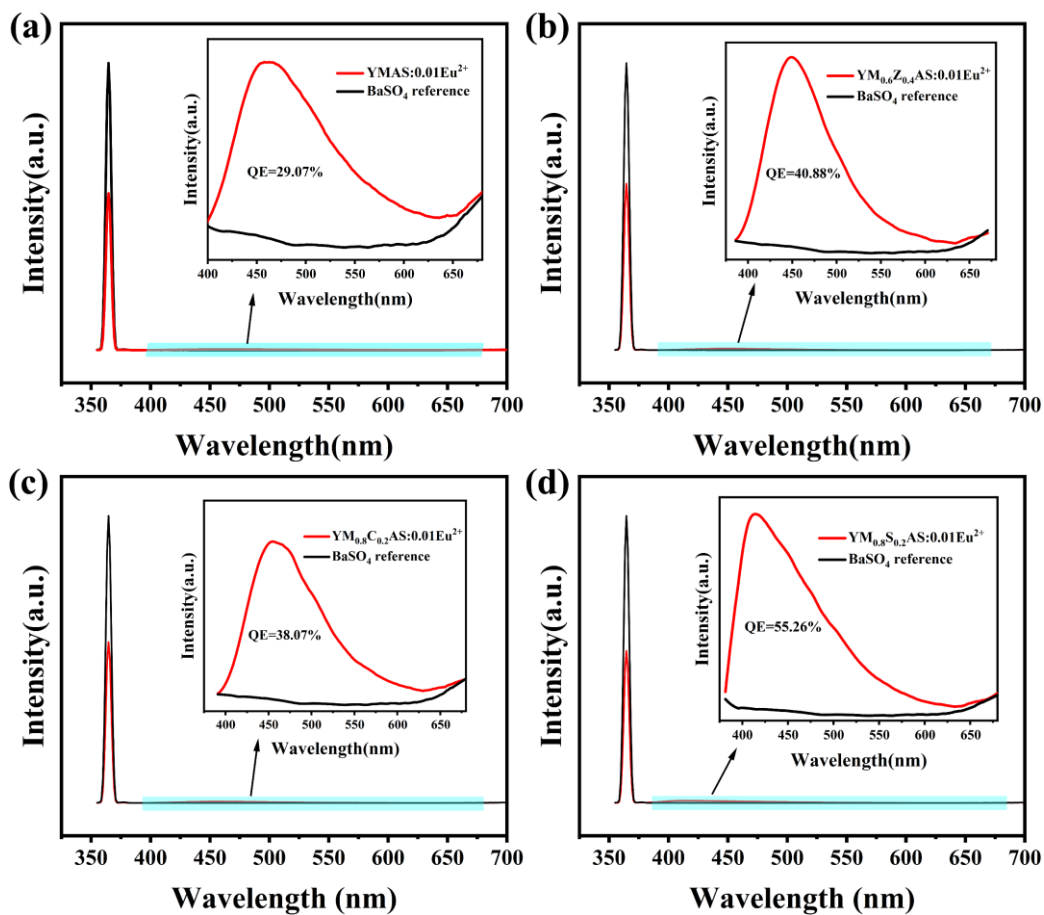

Fig.S7 Quantum efficiency using the HORIBA FLuorolog-3 fluorescence spectrometer and Quanta-φ integrating sphere.



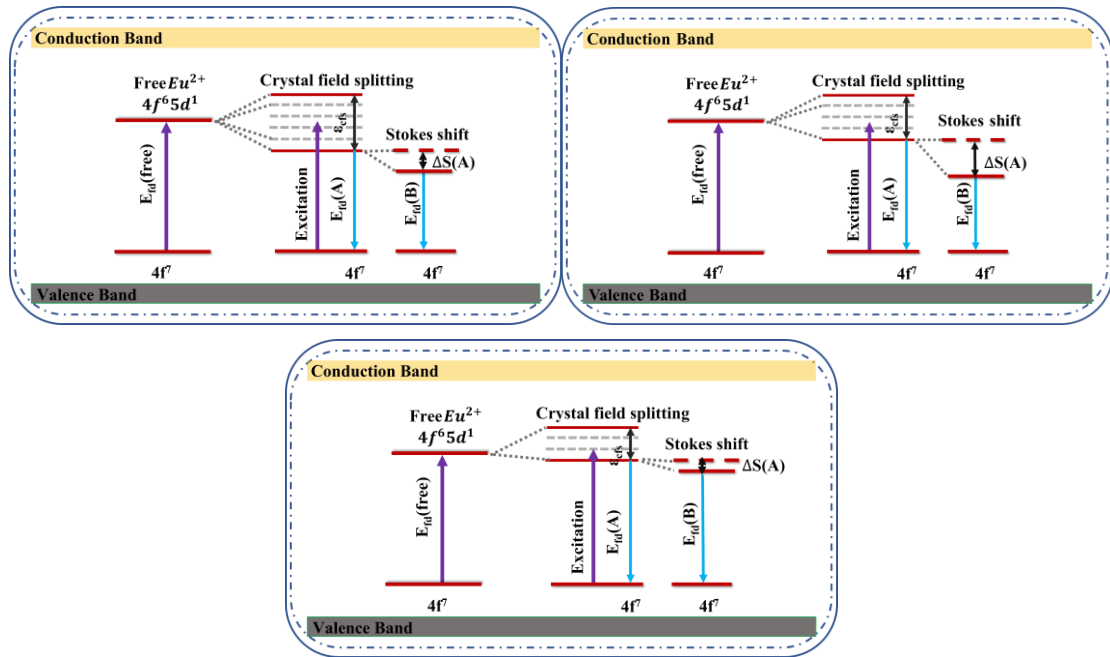

Fig. S8  $\text{Eu}^{2+}$  electron transition level structure diagram in  $\text{Y}_2\text{Mg}_{0.6}\text{Zn}_{0.4}\text{Al}_4\text{SiO}_{12}:0.01\text{Eu}^{2+}$ ,  $\text{Y}_2\text{Mg}_{0.8}\text{Ca}_{0.2}\text{Al}_4\text{SiO}_{12}:0.01\text{Eu}^{2+}$  and  $\text{Y}_2\text{Mg}_{0.8}\text{Sr}_{0.2}\text{Al}_4\text{SiO}_{12}:0.01\text{Eu}^{2+}$ .

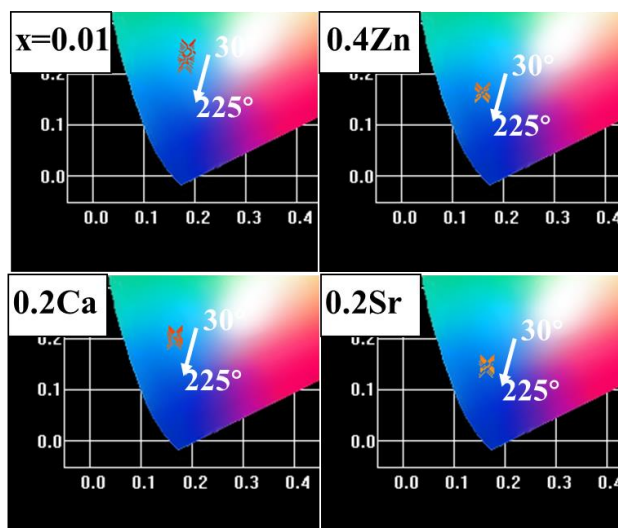

Fig. S9 Chromaticity coordinates of the YMAS:0.01Eu<sup>2+</sup>, Y<sub>2</sub>Mg<sub>0.6</sub>Zn<sub>0.4</sub>Al<sub>4</sub>SiO<sub>12</sub>:0.01Eu<sup>2+</sup>, Y<sub>2</sub>Mg<sub>0.8</sub>Ca<sub>0.2</sub>Al<sub>4</sub>SiO<sub>12</sub>:0.01Eu<sup>2+</sup> and Y<sub>2</sub>Mg<sub>0.8</sub>Sr<sub>0.2</sub>Al<sub>4</sub>SiO<sub>12</sub>:0.01Eu<sup>2+</sup> in temperature range of 30°C to 225 °C.

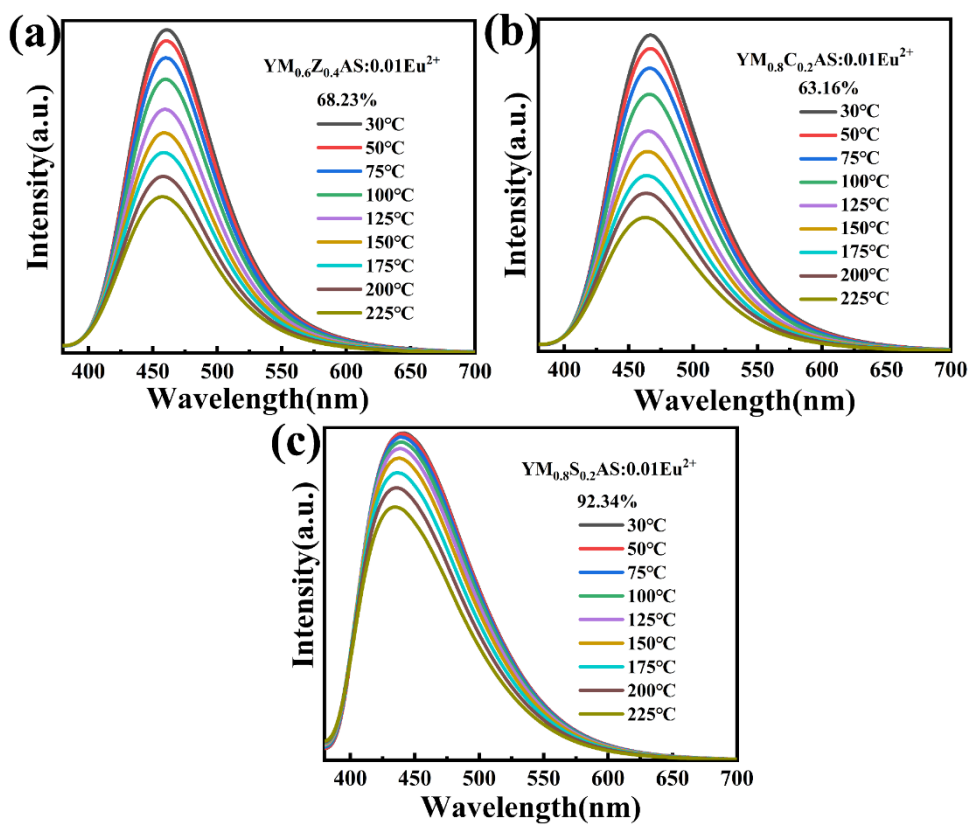

Fig. S10 Temperature spectra of single cation 0.4Zn, 0.2Ca, 0.2Sr substituted for Mg at 365 nm excitation wavelength.

Table S1 Distance from the central atom to the ligand in the octa-ligand

|                 | YMAS   | YMg <sub>0.6</sub> Zn <sub>0.4</sub> AS:0.01Eu <sup>2+</sup> | YMg <sub>0.8</sub> Ca <sub>0.2</sub> AS:0.01Eu <sup>2+</sup> | YMg <sub>0.8</sub> Sr <sub>0.2</sub> AS:0.01Eu <sup>2+</sup> |
|-----------------|--------|--------------------------------------------------------------|--------------------------------------------------------------|--------------------------------------------------------------|
| O <sub>1</sub>  | 2.300  | 2.299                                                        | 2.300                                                        | 2.302                                                        |
| O <sub>2</sub>  | 2.300  | 2.299                                                        | 2.300                                                        | 2.302                                                        |
| O <sub>3</sub>  | 2.300  | 2.299                                                        | 2.300                                                        | 2.302                                                        |
| O <sub>4</sub>  | 2.300  | 2.299                                                        | 2.300                                                        | 2.302                                                        |
| O <sub>5</sub>  | 2.429  | 2.428                                                        | 2.430                                                        | 2.431                                                        |
| O <sub>6</sub>  | 2.429  | 2.428                                                        | 2.430                                                        | 2.431                                                        |
| O <sub>7</sub>  | 2.429  | 2.428                                                        | 2.430                                                        | 2.431                                                        |
| O <sub>8</sub>  | 2.429  | 2.428                                                        | 2.430                                                        | 2.431                                                        |
| d <sub>av</sub> | 2.3645 | 2.3635                                                       | 2.365                                                        | 2.3665                                                       |

Table S2 Distance from the central atom to the ligand in the six coordination

|                 | YMAS  | YMg <sub>0.6</sub> Zn <sub>0.4</sub> AS:0.01Eu <sup>2+</sup> | YMg <sub>0.8</sub> Ca <sub>0.2</sub> AS:0.01Eu <sup>2+</sup> | YMg <sub>0.8</sub> Sr <sub>0.2</sub> AS:0.01Eu <sup>2+</sup> |
|-----------------|-------|--------------------------------------------------------------|--------------------------------------------------------------|--------------------------------------------------------------|
| O <sub>1</sub>  | 1.934 | 1.934                                                        | 1.935                                                        | 1.936                                                        |
| O <sub>2</sub>  | 1.934 | 1.934                                                        | 1.935                                                        | 1.936                                                        |
| O <sub>3</sub>  | 1.934 | 1.934                                                        | 1.935                                                        | 1.936                                                        |
| O <sub>4</sub>  | 1.934 | 1.934                                                        | 1.935                                                        | 1.936                                                        |
| O <sub>5</sub>  | 1.934 | 1.934                                                        | 1.935                                                        | 1.936                                                        |
| O <sub>6</sub>  | 1.934 | 1.934                                                        | 1.935                                                        | 1.936                                                        |
| d <sub>av</sub> | 1.934 | 1.934                                                        | 1.935                                                        | 1.936                                                        |

Table S3 Color purity varies with temperature

| T    | YMAS:<br>0.01Eu <sup>2+</sup> | YM <sub>0.6</sub> Z <sub>0.4</sub> AS:<br>0.01Eu <sup>2+</sup> | YM <sub>0.8</sub> C <sub>0.2</sub> AS:<br>0.01Eu <sup>2+</sup> | YM <sub>0.8</sub> S <sub>0.2</sub> AS:<br>0.01Eu <sup>2+</sup> |
|------|-------------------------------|----------------------------------------------------------------|----------------------------------------------------------------|----------------------------------------------------------------|
| 30°  | 55.12%                        | 73.71%                                                         | 66.30%                                                         | 74.22%                                                         |
| 50°  | 55.25%                        | 73.93%                                                         | 66.62%                                                         | 74.30%                                                         |
| 75°  | 56.38%                        | 74.27%                                                         | 66.28%                                                         | 74.46%                                                         |
| 100° | 56.71%                        | 74.67%                                                         | 66.79%                                                         | 74.76%                                                         |
| 125° | 57.93%                        | 75.12%                                                         | 67.48%                                                         | 74.47%                                                         |
| 150° | 59.26%                        | 74.69%                                                         | 68.06%                                                         | 75.02%                                                         |
| 175° | 59.96%                        | 75.04%                                                         | 67.76%                                                         | 75.72%                                                         |
| 200° | 60.51%                        | 75.45%                                                         | 68.29%                                                         | 75.80%                                                         |
| 225° | 61.80%                        | 75.83%                                                         | 68.87%                                                         | 76.61%                                                         |
